# Supplementary material
Source: PubMed Central journal article supplement (PMC7805328)
Supplement: advancesADV2020002185-suppl1.pdf [file advancesADV2020002185-suppl1.pdf]

## Supplementary Material

### Supplementary Figures

**Suppl. Figure 1** Engraftment and graft failure.

**A.** Cumulative incidence recovery of neutrophil counts > 500 cells/ $\mu$ l and primary graft failure (PGF) as competing risk event. The cumulative incidence of neutrophil engraftment was 86% (95% CI: 78-93) at day +28. Eighty-one patients achieved primary neutrophil in a median of 17 days. **B.** Cumulative incidence of secondary graft failure was 15% (7-23) at 36 months after transplant.

**Suppl. Figure 2**

Patients transplantation outcome overview. 84 pediatric patients with LAD underwent alloHSCT. The state of engraftment and patient's outcome at their last follow-up are given. PGF, primary graft failure; SGF, secondary GF; F/U, follow-up; d, day

### Supplementary Tables

**Suppl. Table 1** Univariate analysis of overall survival (OS) for the entire cohort.

**Suppl. Table 2** Univariate analysis EFS for the entire cohort.

**Suppl. Table 3** Univariate analysis cumulative incidence of aGVHD II-IV for the entire cohort.

**Suppl. Table 4** Univariate analysis graft failure (GF) for the entire cohort.

**Suppl. Table 5** Patients' and transplant's characteristics stratified by age group.

**Suppl. Table 6** Outcomes stratified by age at transplant.

Supl. Figure 1

**A**

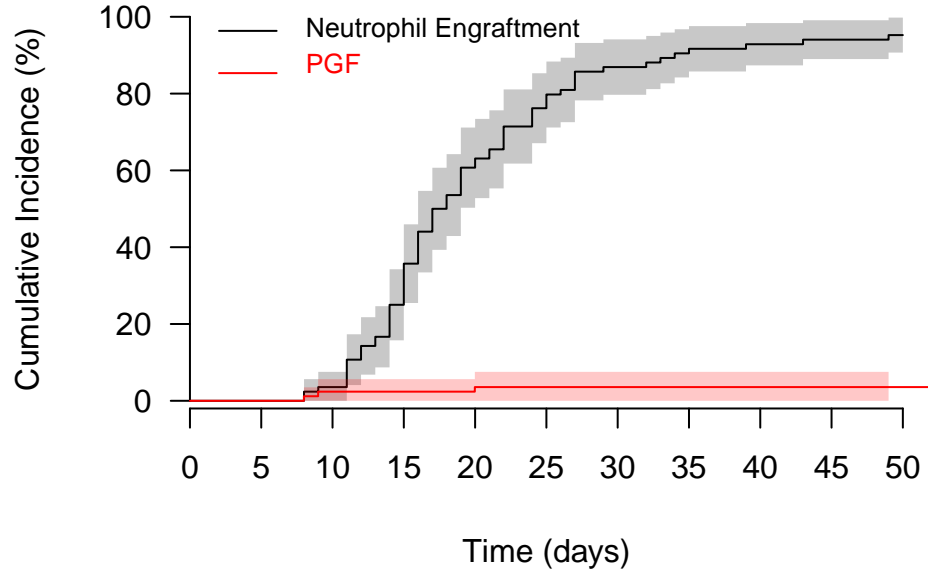

**B**

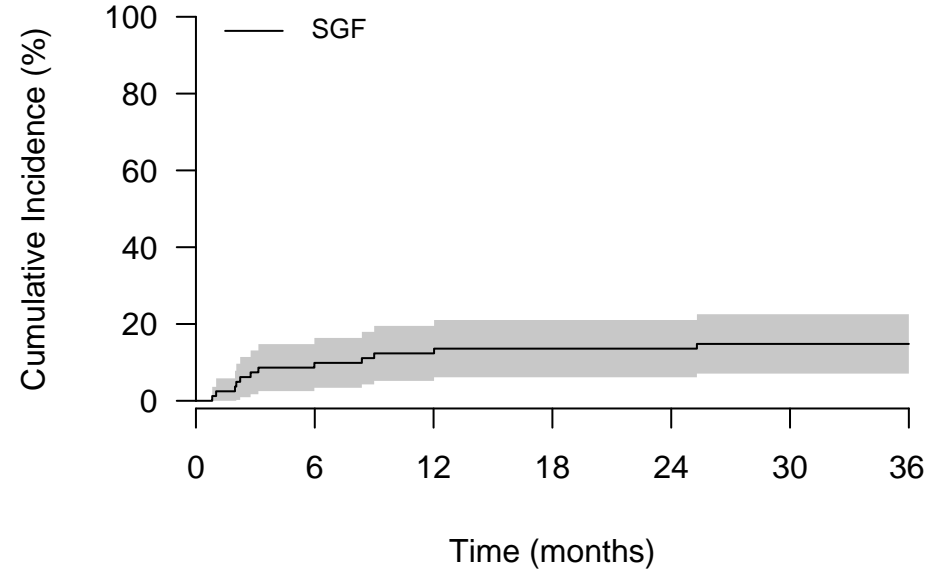

Supl. Figure 2

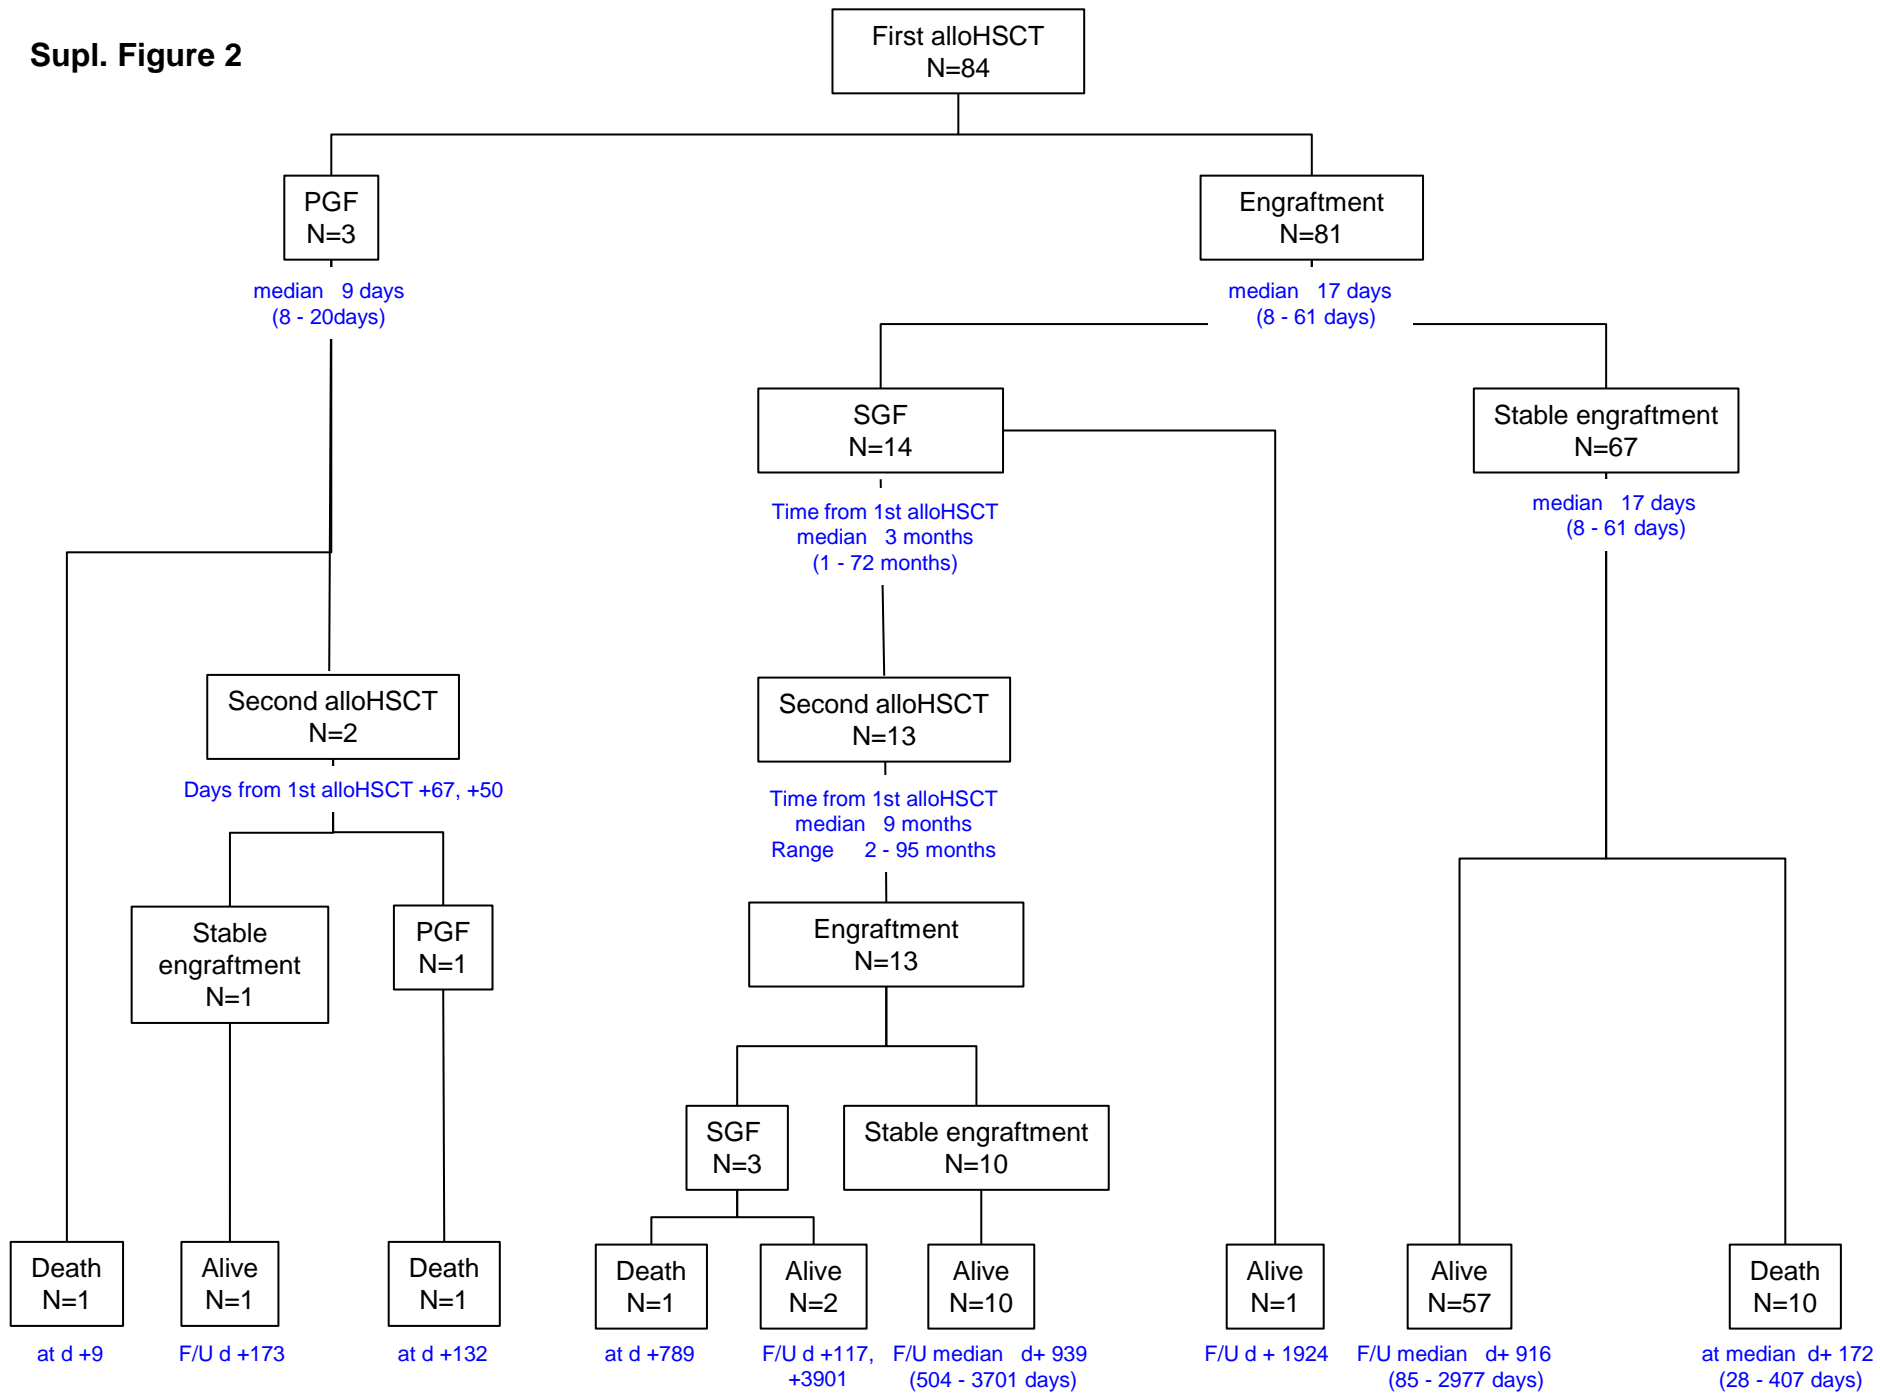

**Supplement Table 1: Univariate analysis OS for the entire cohort**

|                                     | ev/N  | Estimate at 36 months<br>(95% CI) | P        |
|-------------------------------------|-------|-----------------------------------|----------|
| <b>Sex</b>                          |       |                                   | 0.913    |
| Female                              | 6/40  | 84% (73-96)                       |          |
| Male                                | 7/43  | 81% (67-94)                       |          |
| <b>LAD type</b>                     |       |                                   | 0.771    |
| LAD type I                          | 10/69 | 84% (75-93)                       |          |
| LAD type III                        | 2/11  | 75% (44-100)                      |          |
| <b>AlloHSCT year</b>                |       |                                   | 0.369    |
| 2007-2012                           | 8/41  | 78% (64-92)                       |          |
| 2013-2017                           | 5/43  | 88% (78-98)                       |          |
| <b>Age at alloHSCT</b>              |       |                                   | 0.272    |
| < 13 months                         | 5/42  | 88% (78-98)                       |          |
| ≥ 13 months                         | 8/42  | 75% (59-91)                       |          |
| <b>Lansky/Karnofsky Performance</b> |       |                                   | 0.043    |
| Score 100-90                        | 6/44  | 84% (72-96)                       |          |
| Score <90                           | 7/19  | 61% (38-84)                       |          |
| <b>AlloHSCT source</b>              |       |                                   | 0.336    |
| BM                                  | 5/44  | 87% (76-98)                       |          |
| CB                                  | 4/16  | 71% (46-95)                       |          |
| PB                                  | 4/20  | 80% (62-98)                       |          |
| <b>Donor</b>                        |       |                                   | 0.001    |
| MSD                                 | 2/32  | 93% (85-100)                      | } 0.918¥ |
| MUD 10/10 + MFD                     | 2/28  | 93% (84-100)                      |          |
| MUD 9/10                            | 3/5   | 60% (29-100)*                     |          |
| MMD (CB + MMFD)                     | 4/17  | 70% (49-100)                      |          |
| <b>CMV recipient-donor</b>          |       |                                   | 0.003    |
| -/-                                 | 1/19  | 95% (85-100)                      |          |
| -/+                                 | 3/9   | 64% (24-100)                      |          |
| +/-                                 | 4/10  | 50% (13-87)                       |          |
| +/+                                 | 1/32  | 97% (90-100)                      |          |
| <b>CMV recipient-donor</b>          |       |                                   | <0.001   |
| Matched                             | 2/51  | 96% (90-100)                      |          |
| Mismatched                          | 7/19  | 56% (35-89)                       |          |
| <b>Conditioning regimen</b>         |       |                                   | 0.098    |
| Non-MA                              | 4/17  | 73% (50-100)                      |          |
| MA                                  | 9/64  | 85% (75-94)                       |          |
| <b>Conditioning drugs</b>           |       |                                   | 0.292    |
| Busulfan based                      | 8/42  | 80% (67-92)                       |          |
| Treosulfan based                    | 2/26  | 92% (82-100)                      |          |
| Other                               | 3/15  | 76% (51-100)                      |          |
| <b>Serotherapy</b>                  |       |                                   | 0.120    |
| No                                  | 1/21  | 95% (86-100)                      |          |
| ATG                                 | 11/51 | 74% (60-88)                       |          |

|                         | ev/N | Estimate at 36 months<br>(95% CI) | P       |
|-------------------------|------|-----------------------------------|---------|
| Alemtuzumab             | 1/11 | 91% (74-100)                      |         |
| <b>GVHD Prophylaxis</b> |      |                                   |         |
| CSA                     | 2/20 | 89% (75-100)                      | } 0.638 |
| CSA+MMF                 | 3/15 | 80% (60-100)                      |         |
| CSA+MTX                 | 3/27 | 89% (76-100)                      |         |
| CSA+corticosteroids     | 3/8  | 57% (20-94)                       |         |
| Other                   | 1/8  | 88% (65-100)                      |         |

AlloHSCT, allogeneic hematopoietic stem cell transplantation; ATG, anti-thymocyte globulin; BM, bone marrow; CB, cord blood; CI, confidence interval; CMV, cytomegalovirus; CSA, cyclosporine A; ev, event; HLA, human leucocyte antigen; LAD, leukocyte adhesion deficiency; MA, myeloablative; MFD, matched family donor; MMF, mycophenolate mofetil; MMD mismatch donor; MSD, match sibling donor; MUD, match unrelated donor; MTX, methotrexate; PB, peripheral blood; y, year

\* reached estimate before 36 months.

¥Subgroup comparison

**Supplement Table 2: Univariate analysis EFS for the entire cohort**

|                                     | ev/N  | Estimate at 36 months<br>(95% CI) | P        |
|-------------------------------------|-------|-----------------------------------|----------|
| <b>Sex</b>                          |       |                                   | 0.137    |
| Female                              | 14/39 | 66% (51-81)                       |          |
| Male                                | 20/39 | 48% (32-64)                       |          |
| <b>LAD type</b>                     |       |                                   | 0.934    |
| LAD type I                          | 28/66 | 58% (46-70)                       |          |
| LAD type III                        | 4/9   | 56% (23-88)                       |          |
| <b>Age at alloH SCT</b>             |       |                                   | 0.004    |
| < 13 months                         | 12/39 | 72% (57-86)                       |          |
| ≥ 13 months                         | 23/40 | 42% (26-57)                       |          |
| <b>Lansky/Karnofsky Performance</b> |       |                                   | 0.323    |
| Score 100-90                        | 18/42 | 57% (41-72)                       |          |
| Score <90                           | 11/18 | 39% (16-61)                       |          |
| <b>AlloH SCT source</b>             |       |                                   | 0.054    |
| BM                                  | 14/44 | 68% (54-82)                       |          |
| CB                                  | 10/15 | 38% (12-63)                       |          |
| PB                                  | 10/19 | 47% (25-70)                       |          |
| <b>Donor</b>                        |       |                                   | 0.003    |
| MSD                                 | 5/29  | 82% (68-98)                       | } 0.011¥ |
| MUD 10/10 + MFD                     | 14/28 | 50% (35-72)                       |          |
| MUD 9/10                            | 4/5   | 20% (35-100)*                     |          |
| MMD                                 | 10/15 | 40% (22-74)                       |          |
| <b>CMV recipient-donor</b>          |       |                                   | 0.004    |
| -/-                                 | 9/19  | 58% (36-80)                       |          |
| -/+                                 | 6/9   | 33% (13-84) *                     |          |
| +/-                                 | 7/10  | 30% (2-58)                        |          |
| +/+                                 | 5/29  | 82% (68-96)                       |          |
| <b>CMV recipient-donor</b>          |       |                                   | <0.001   |
| Matched                             | 12/48 | 72 (60-86)                        |          |
| Mismatched                          | 13/19 | 32 (16-61)                        |          |
| <b>Conditioning regimen</b>         |       |                                   | 0.414    |
| Non-MA                              | 8/16  | 48% (23-74)                       |          |
| MA                                  | 27/62 | 58% (46-70)                       |          |
| <b>Conditioning drugs</b>           |       |                                   | 0.812    |
| Busulfan based                      | 17/40 | 57% (42-73)                       |          |
| Treosulfan based                    | 11/23 | 57% (36-77)                       |          |
| Other                               | 7/15  | 51% (25-78)                       |          |
| <b>Serotherapy</b>                  |       |                                   | 0.008    |
| No                                  | 4/20  | 80% (62-98)                       |          |
| ATG                                 | 28/48 | 42% (28-57)                       |          |
| Alemtuzumab                         | 3/10  | 70% (42-98)                       |          |
| <b>GVHD Prophylaxis</b>             |       |                                   |          |
| CSA                                 | 7/19  | 68% (46-89)                       | } 0.986  |
| CSA+MMF                             | 5/14  | 64% (39-89)                       |          |

|                     |      |             |
|---------------------|------|-------------|
| CSA+MTX             | 9/27 | 66% (48-84) |
| CSA+corticosteroids | 6/8  | 25% (0-55)  |
| Other               | 6/8  | 25% (8-83)* |

AlloHSCT, allogeneic hematopoietic stem cell transplantation; ATG, anti-thymocyte globulin; BM, bone marrow; CB, cord blood; CI, confidence interval; CMV, cytomegalovirus; CSA, cyclosporine A; ev, event; HLA, human leucocyte antigen; LAD, leukocyte adhesion deficiencies; MA, myeloablative; MMF, mycophenolate mofetil; MFD, matched family donor; MMD mismatch donor; MSD, match sibling donor; MTX, methotrexate; MUD, match unrelated donor; PB, peripheral blood; y, year  
 \* reached estimate before 36 months.

¥Subgroup comparison.

**Supplement Table 3: Univariate analysis cumulative incidence of aGVHD II-IV for the entire cohort.**

|                                     | ev/N  | Estimate at 100 d (95% CI) | P        |
|-------------------------------------|-------|----------------------------|----------|
| <b>Sex</b>                          |       |                            | 0.332    |
| Female                              | 8/39  | 18% (6-30)                 |          |
| Male                                | 11/39 | 28% (14-42)                |          |
| <b>LAD type</b>                     |       |                            | 0.798    |
| LAD type I                          | 16/66 | 24% (14-35)                |          |
| LAD type III                        | 2/9   | 11% (0-32)                 |          |
| <b>Age at alloHSCT</b>              |       |                            | 0.008    |
| < 13 months                         | 5/39  | 10% (1-20)                 |          |
| ≥ 13 months                         | 15/40 | 38% (22-53)                |          |
| <b>Lansky/Karnofsky Performance</b> |       |                            | 0.888    |
| Score 100-90                        | 11/42 | 26% (13-40)                |          |
| Score <90                           | 5/18  | 28% (7-48)                 |          |
| <b>AlloHSCT source</b>              |       |                            | 0.14     |
| BM                                  | 7/44  | 16% (5-27)                 |          |
| CB                                  | 5/15  | 27% (4-49)                 |          |
| PB                                  | 7/19  | 37% (15-59)                |          |
| <b>Donor</b>                        |       |                            | 0.071    |
| MSD                                 | 3/29  | 10% (0-21)                 | } 0.087¥ |
| MUD 10/10 + MFD                     | 8/28  | 25% (9-41)                 |          |
| MUD 9/10                            | 3/5   | 60% (17-100)               |          |
| MMD (CB + MMFD)                     | 4/15  | 27% (4-49)                 |          |
| <b>CMV recipient-donor</b>          |       |                            | 0.110    |
| -/-                                 | 3/19  | 11% (0-24)                 |          |
| -/+                                 | 4/9   | 44% (12-77)                |          |
| +/-                                 | 4/10  | 40% (10-70)                |          |
| +/+                                 | 4/29  | 14% (1-26)                 |          |
| <b>CMV recipient-donor</b>          |       |                            | 0.018    |
| Matched                             | 7/48  | 13% (3-22)                 |          |
| Mismatched                          | 8/19  | 42% (20-64)                |          |
| <b>Conditioning regimen</b>         |       |                            | 0.066    |
| Non-MA                              | 7/16  | 44% (20-68)                |          |
| MA                                  | 13/62 | 19% (10-29)                |          |
| <b>Conditioning drugs</b>           |       |                            | 0.333    |
| Busulfan based                      | 9/40  | 23% (10-35)                |          |
| Treosulfan based                    | 6/24  | 21% (2-33)                 |          |
| Other                               | 5/14  | 38% (16-68)                |          |
| <b>Serotherapy</b>                  |       |                            | 0.434    |
| No                                  | 3/20  | 10% (0-23)                 |          |
| ATG                                 | 14/48 | 29% (16-42)                |          |
| Alemtuzumab                         | 3/10  | 30% (2-58)                 |          |
| <b>GVHD Prophylaxis</b>             |       |                            | 0.884    |
| CSA                                 | 4/19  | 22% (3-41)                 |          |
| CSA+MMF                             | 2/14  | 14% (0-33)                 |          |
| CSA+MTX                             | 5/27  | 19% (4-33)                 |          |
| CSA+corticosteroids                 | 4/8   | 50% (15-85)                |          |
| Other                               | 5/8   | 50% (15-85)                |          |

AlloHSCT, allogeneic hematopoietic stem cell transplantation; ATG, anti-thymocyte globulin; BM, bone marrow; CB, cord blood; CI, confidence interval; CMV, cytomegalovirus; CSA, cyclosporine A; ev, event; HLA, human leucocyte antigen; LAD, leukocyte adhesion deficiencies; MA, myeloablative; MFD, matched family donor; MMD mismatch donor; MSD, match sibling donor; MTX, methotrexate; MUD, match unrelated donor; PB, peripheral blood; y, year

\* reached estimate before 36 months.

¥Subgroup comparison.



**Supplement Table 4: Univariate analysis graft failure (GF) for the entire cohort.**

|                                     | ev/N  | Estimate at 36 months<br>(95% CI) | P        |
|-------------------------------------|-------|-----------------------------------|----------|
| <b>Sex</b>                          |       |                                   | 0.759    |
| Female                              | 8/40  | 17% (4-30)                        |          |
| Male                                | 9/43  | 22% (9-36)                        |          |
| <b>LAD type</b>                     |       |                                   | 0.321    |
| LAD type I                          | 13/69 | 18% (8-27)                        |          |
| LAD type III                        | 3/11  | 30% (2-58)                        |          |
| <b>Age at alloHSCT</b>              |       |                                   | 0.074    |
| < 13 months                         | 6/42  | 13% (2-24)                        |          |
| ≥ 13 months                         | 11/42 | 26% (12-40)                       |          |
| <b>Lansky/Karnofsky Performance</b> |       |                                   | 0.396    |
| Score 100-90                        | 7/44  | 16% (5-27)                        |          |
| Score <90                           | 5/19  | 29% (7-50)                        |          |
| <b>alloHSCT source</b>              |       |                                   | 0.320    |
| BM                                  | 6/44  | 16% (4-28)                        |          |
| CB                                  | 5/16  | 26% (4-48)                        |          |
| PB                                  | 4/20  | 20% (2-38)                        |          |
| <b>Donor</b>                        |       |                                   | 0.105    |
| MSD                                 | 4/32  | 14% (0-30)                        | } 0.651¥ |
| MUD 10/10 + MFD                     | 5/28  | 18% (4-32)                        |          |
| MUD 9/10                            | 1/5   | 20 (0-55)*                        |          |
| MMD (CB + MMFD)                     | 7/17  | 36% (13-60)                       |          |
| <b>CMV recipient-donor</b>          |       |                                   | 0.818    |
| -/-                                 | 5/19  | 21% (3-39)                        |          |
| -/+                                 | 1/9   | 11% (0-32)*                       |          |
| +/-                                 | 2/10  | 20% (0-45)                        |          |
| +/+                                 | 4/32  | 18% (1-34)                        |          |
| <b>CMV recipient-donor</b>          |       |                                   | 0.958    |
| Matched                             | 9/51  | 18% (0 - 32)                      |          |
| Mismatched                          | 3/19  | 16% (0 -26)                       |          |
| <b>Conditioning regimen</b>         |       |                                   | 0.225    |
| Non-MA                              | 1/17  | 6% (0-17)                         |          |
| MA                                  | 15/64 | 20% (11-30)                       |          |
| <b>Conditioning drugs</b>           |       |                                   | 0.295    |
| Busulfan based                      | 8/42  | 20% (8-33)                        |          |
| Treosulfan based                    | 8/26  | 25% (8-43)                        |          |
| Other                               | 1/15  | 7% (0-19)                         |          |
| <b>GVHD Prophylaxis</b>             |       |                                   |          |
| CSA                                 | 3/20  | 13% (0-30)                        | } 0.441  |
| CSA+MMF                             | 4/15  | 27% (4-49)                        |          |
| CSA+MTX                             | 3/27  | 14% (0-29)                        |          |
| CSA+corticosteroids                 | 3/8   | 27% (0-59)                        |          |
| Other                               | 1/8   | 12% (0-35)                        |          |

AlloHSCT, allogeneic hematopoietic stem cell transplantation; BM, bone marrow; CB, cord blood; CI, confidence interval; CMV, cytomegalovirus; CSA, cyclosporine A; ev, event; HLA, human leucocyte antigen; LAD, leukocyte adhesion deficiencies; MA, myeloablative; MFD, matched family donor; MMD mismatch donor; MSD, match sibling donor; MTX, methotrexate; MUD, match unrelated donor; PB, peripheral blood; y, year

\* reached estimate before 36 months.

¥Subgroup comparison

**Supplemental Table 5. Patient's and transplant's characteristics stratified by age group**

|                                                                   | Stratified by Median of Age |                      |        |
|-------------------------------------------------------------------|-----------------------------|----------------------|--------|
|                                                                   | < 13 months                 | ≥ 13 months          | P      |
| <b>N</b>                                                          | 42                          | 42                   |        |
| <b>Age at Diagnose, (median [IQR]) (months)</b>                   | 1.92 [0.72 - 3.09]          | 11.64 [4.77 - 19.44] | <0.001 |
| Range                                                             | 0 -9.72                     | 0.24 – 130.56        |        |
| <b>Time between diagnosis and alloHSCT, median [IQR] (months)</b> | 3.00 [1.82 - 5.08]          | 17.10 [8.96 - 50.29] | <0.001 |
| Range                                                             | 0.55 – 11.50                | 0.60 – 353.35        |        |
| <b>Sex, N (%)</b>                                                 |                             |                      | 0.512  |
| Female                                                            | 22 (52)                     | 18 ( 44)             |        |
| Male                                                              | 20 (48)                     | 23 ( 56)             |        |
| No data                                                           | 0                           | 1                    |        |
| <b>LAD type, N (%)</b>                                            |                             |                      | 0.520  |
| LAD type I                                                        | 35 (83)                     | 34 ( 81)             |        |
| LAD type III                                                      | 4 (10)                      | 7 ( 17)              |        |
| Other                                                             | 3 (7)                       | 1 ( 2)               |        |
| <b>Lansky/Karnofsky Performance, N (%)</b>                        |                             |                      | 0.033  |
| Score 100                                                         | 8 (28)                      | 14 (41)              |        |
| Score 90                                                          | 11 (38)                     | 11 (32)              |        |
| Score 80                                                          | 9 (31)                      | 7 (21)               |        |
| Score 70                                                          | 1 (3)                       | 0                    |        |
| Score 60                                                          | 0                           | 2 (6)                |        |
| No data/not evaluated                                             | 13                          | 8                    |        |
| <b>AlloHSCT source, N (%)</b>                                     |                             |                      | 0.371  |
| BM                                                                | 23 (59)                     | 21 ( 51)             |        |
| CB                                                                | 9 (23)                      | 7 ( 17)              |        |
| PB                                                                | 7 (18)                      | 13 ( 32)             |        |
| No data                                                           | 3                           | 1                    |        |
| <b>Donor, N (%)</b>                                               |                             |                      | 0.138  |
| MSD                                                               | 15 (37)                     | 17 (41)              |        |
| MUD 10/10 + MFD                                                   | 17 (41)                     | 11 (27)              |        |
| MUD 9/10                                                          | 0                           | 5 (12)               |        |
| MMD (CB + MMFD)                                                   | 9 (22)                      | 8 (20)               |        |
| No data                                                           | 1                           | 1                    |        |
| <b>CMV recipient-Donor, N (%)</b>                                 |                             |                      | 0.281  |
| -/-                                                               | 13 (36)                     | 6 ( 18)              |        |
| -/+                                                               | 3 (8)                       | 6 (18)               |        |
| +/-                                                               | 4 (11)                      | 6 (18)               |        |
| +/+                                                               | 16 (44)                     | 16 (47)              |        |
| No data                                                           | 6                           | 8                    |        |
| <b>Conditioning regimen, N (%)</b>                                |                             |                      | 0.592  |
| Non-MA                                                            | 7 (18)                      | 10 (24)              |        |
| MA                                                                | 32 (82)                     | 32 (67)              |        |
| No data                                                           | 3                           | 0                    |        |
| <b>Conditioning drugs, N (%)</b>                                  |                             |                      | 1      |
| Busulfan based                                                    | 21 (51)                     | 21 ( 50)             |        |
| Bu+Cy                                                             | 8 (20)                      | 9 (21)               |        |
| Bu+Flu                                                            | 10 (24)                     | 11 (26)              |        |
| Bu+Flu+Cy                                                         | 0                           | 1 ( 2.4)             |        |
| Bu+Flu+TT                                                         | 3 (7)                       | 0 ( 0.0)             |        |
| Treosulfan based                                                  | 13 (32)                     | 13 (31)              |        |
| Treo+Cy                                                           | 1 ( 2)                      | 0 (0)                |        |

|                                | Stratified by Median of Age |             | P            |
|--------------------------------|-----------------------------|-------------|--------------|
|                                | < 13 months                 | ≥ 13 months |              |
| Treo+Flu                       | 6 (15)                      | 8 (19)      |              |
| Treo+Flu+TT                    | 6 (15)                      | 4 (10)      |              |
| Treo+Mel+Flu                   | 0 (0)                       | 1 (2)       |              |
| Other                          | 7 (17)                      | 8 (19)      |              |
| Mel+Flu                        | 6 (15)                      | 7 (17)      |              |
| Mel+Flu+TT                     | 1 (2)                       | 1 (2)       |              |
| No data                        | 1                           | 0           |              |
| <b>Serotherapy, N (%)</b>      |                             |             | <b>0.159</b> |
| No                             | 13 (32)                     | 8 (19)      |              |
| Yes                            | 28 (68)                     | 34 (81)     |              |
| ATG                            | 21 (51)                     | 30 (71)     |              |
| Alemtuzumab                    | 7 (17)                      | 4 (10)      |              |
| No data                        | 1                           | 0           |              |
| <b>GVHD Prophylaxis, N (%)</b> |                             |             | <b>0.477</b> |
| CSA                            | 10 (26)                     | 10 (24)     |              |
| CSA+corticosteroids            | 4 (11)                      | 4 (10)      |              |
| CSA+MMF                        | 10 (26)                     | 5 (12)      |              |
| CSA+MTX                        | 11 (29)                     | 16 (38)     |              |
| No                             | 0 (0)                       | 2 (5)       |              |
| Other                          | 3 (8)                       | 5 (12)      |              |
| No data                        | 4                           | 0           |              |

AlloHSCT, allogeneic hematopoietic stem cell transplantation; ATG, anti-thymocyte globulin; BM, bone marrow; Bu, busulfan; CB, cord blood; CI, confidence interval; CMV, cytomegalovirus; CSA, cyclosporine A; ev, event; Flu, fludarabine; HLA, human leucocyte antigen; HR, hazard ratio; LAD, leukocyte adhesion deficiencies; MA, myeloablative; MFD, matched family donor; MMD mismatch donor; MSD, match sibling donor; MTX, methotrexate; MUD, match unrelated donor; PB, peripheral blood; y, year.

**Supplemental Table 6. Outcomes stratified by age at transplantation**

|                                                    | < 13 months | ≥ 13 months | P     |
|----------------------------------------------------|-------------|-------------|-------|
| <b>Neutrophil engraftment</b>                      |             |             | 0.991 |
| 28d- cumulative incidence, % (95% CI)              | 83 (72-95)  | 88 (78-99)  |       |
| At day 100, N (%)                                  | 41 (98)     | 40 (95)     |       |
| Median time to engraftment, days                   | 18          | 17          |       |
| Range time to engraftment, days                    | 11 - 43     | 8 - 61      |       |
| <b>Primary graft failure</b>                       |             |             | 0.560 |
| 28d- cumulative incidence, % (95% CI)              | 2 (0 -7)    | 5 (0-11)    |       |
| <b>Secondary graft failure</b>                     |             |             | 0.079 |
| 3y-estimate, % (95% CI)                            | 10 (1-19)   | 20 (8-32)   |       |
| Range time to SGF, months                          | 3 – 43      | 1 – 72      |       |
| <b>Overall survival</b>                            |             |             | 0.272 |
| 3y-OS estimate, % (95% CI)                         | 88 (79-98)  | 75 (59-91)  |       |
| <b>Event-Free survival</b>                         |             |             | 0.004 |
| 3y-EFS estimate, % (95% CI)                        | 72 (57-86)  | 42 (26-57)  |       |
| <b>Acute GVHD</b>                                  |             |             | 0.008 |
| 100d-cumulative incidence grade II-IV, % (95% CI)  | 10 (1-20)   | 38 (23-53)  |       |
| 100d-cumulative incidence grade III-IV, % (95% CI) | 3 (0-8)     | 23 (10-35)  | 0.007 |
| <b>Chronic GVHD</b>                                |             |             | 0.011 |
| 3y-cumulative incidence, % (95% CI)                | 3 (0-8)     | 22 (9-36)   |       |
| Yes; N                                             | 1           | 8           |       |
| Limited/extensive/not specified                    |             |             |       |
| No, N                                              | 36          | 28          |       |
| Not applicable (OS < 100 days), N                  | 1           | 4           |       |
| No data, N                                         | 4           | 2           |       |

CI, confidence interval; d, day; EFS, event-free-survival; GVHD, graft-versus-host disease; LAD, leukocyte adhesion deficiencies, OS, overall survival; PGF, primary graft failure; SGF, secondary graft failure; y year.

P values determined using log-rank test or Gray Test as appropriate.
